# Supplementary material for: ABA represses TOR and root meristem activity through nuclear exit of the SnRK1 kinase
Source: PubMed Central journal article supplement (PMC9282376; doi:10.1073/pnas.2204862119), 2022-07-05
Supplement: pnas.2204862119.sapp.pdf [file pnas.2204862119.sapp.pdf]

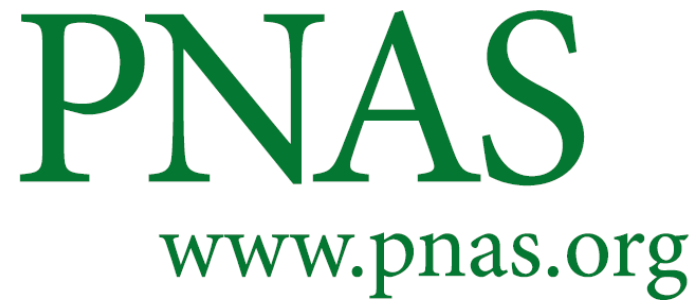

**Supplementary Information for**

ABA represses TOR and root meristem activity through nuclear exit of the SnRK1 kinase.

Borja Belda-Palazón<sup>1,6\*</sup>, Mónica Costa<sup>1,2,3</sup>, Tom Beeckman<sup>2,3</sup>, Filip Rolland<sup>4,5</sup>, Elena Baena-González<sup>1,7\*</sup>

Borja Belda-Palazón, Elena Baena-González

Email: [bbelda@ibmcp.upv.es](mailto:bbelda@ibmcp.upv.es), [elena.baena-gonzalez@plants.ox.ac.uk](mailto:elena.baena-gonzalez@plants.ox.ac.uk)

**This PDF file includes:**

Supplementary text

## 1 **Plant material and growth**

2 All *Arabidopsis* plants used in this study are in the Columbia (Col-0) background. Unless otherwise  
3 specified, plants were grown under long-day conditions (16 h light, 100  $\mu\text{mol m}^{-2} \text{s}^{-1}$ , 22 °C/8 h  
4 dark, 18 °C) on 0.5X MS medium (0.05% MES and 0.8% phytoagar).

5 All the following lines were previously described: *snrk2d* [*snrk2.2* (GABI-Kat 807G04)/ *snrk2.3*  
6 (SALK\_107315); (1)], *snrk2d/1 $\alpha$ 1* [*snrk1 $\alpha$ 1-3* (GABI\_579E09); (2)], *SnRK2.2-GFP #2.2* (3),  
7 *SnRK1 $\alpha$ 1-GFP#1* (4), *SnRK1 $\alpha$ 1-GFP#2* (5), *control- $\alpha$ 1* and *NLS- $\alpha$ 1* (6), *NLS-ACC* (7). The  
8 *SnRK1 $\alpha$ 1-GFP#2 snrk2d* transgenic line was obtained by crossing *SnRK1 $\alpha$ 1-GFP#2* to *snrk2d*.

## 9 **Analyses of root apical meristem development**

10 For assaying root apical meristem development, seedlings were grown vertically for 5 days in 0.5X  
11 MS and transferred to 0.5X MS plates with or without 5  $\mu\text{M}$  ABA where seedlings were allowed to  
12 grow vertically for 2 more days. Roots were stained for 2 min with an aqueous solution of propidium  
13 iodide (PI; 10  $\mu\text{g}/\text{mL}$ ) and images were acquired on a Zeiss LSM980 system [using Airyscan  
14 SR/Multiplex4Y mode] equipped with two PMT and one GaAsP, using a 40 $\times$  1.1NA water  
15 immersion objective. For the visualization of cell walls, pinholes were adjusted to 1 Air Unit (561  
16 nm/600-660 nm). Post-acquisition image processing was performed using Zeiss's ZEN Blue v3.0  
17 imaging software and ImageJ (<http://rsb.info.gov/ij/>). Quantification of cortical cell number and  
18 meristem size was done from the region comprised between the quiescent center and the  
19 beginning of the transition zone (defined as the point where cortical cell length is first doubled).  
20 Meristem length was measured at the center of the vascular bundle. Measurements were  
21 performed from 23–24 seedlings per genotype and condition and grown as 3 independent batches.

## 22 **Subcellular localization analyses by CLSM**

23 The localization of SnRK1 $\alpha$ 1 and SnRK2.2 was investigated in roots of *SnRK1 $\alpha$ 1-GFP#1*,  
24 *SnRK1 $\alpha$ 1-GFP#2*, *SnRK1 $\alpha$ 1-GFP#2 snrk2d* and *SnRK2.2-GFP* seedlings grown vertically on 0.5 $\times$   
25 MS plates for 4 days (primary roots) or 9 days (lateral roots). On day 4, seedlings were transferred  
26 to liquid 0.5 $\times$  MS one hour after the onset of the lights and allowed to acclimate for two hours.  
27 Seedlings were thereafter treated with mock, 50  $\mu\text{M}$  ABA or 50  $\mu\text{M}$  ABA + 2.5  $\mu\text{M}$  LMB for 3h. In  
28 the case of the combined treatment of LMB and ABA, seedlings were preincubated with LMB for  
29 one hour during the acclimation period before the addition of ABA. Roots were stained with PI and  
30 images were acquired on a Zeiss LSM980 system as described above for the visualization of the  
31 cell walls. Given that nuclear SnRK1 activity is rapidly induced in response to darkness (6, 7),  
32 special care was taken to minimize the time seedlings were kept outside of the growth chamber to  
33 avoid shading-derived signals that could confound the ABA response. Special care was also taken  
34 to image seedlings immediately after their transfer from the treatment medium

35 (mock/ABA/LMB+ABA) to the microscope slides to minimize a decline in the effects of the  
36 treatment. For the visualization of GFP, pinholes were adjusted to 1 Air Unit (488 nm/500-530 nm).  
37 For quantitative analysis of GFP, the power of the 488 nm laser was set at 3.0% transmission to  
38 gain master of 800. Post-acquisition image processing was performed using with Zeiss's ZEN Blue  
39 v3.0 imaging software and ImageJ (<http://rsb.info.gov/ij/>).

40 The nuclear/cytoplasmic localization of SnRK1 $\alpha$ 1 and SnRK2.2 was assessed using CLSM  
41 and ImageJ software, calculating the N/C ratio (N/C = Mean Nuclear Fluorescence Intensity / Mean  
42 Cytoplasmic Fluorescence Intensity, with Mean Fluorescence Intensity being the ratio between the  
43 total fluorescence intensity measured and the number of pixels measured) (8). The area of the  
44 nucleus was determined by analyzing the bright field acquired through the transmitted light mode  
45 whilst the area of the cytoplasm was selected using the PI signal as a reference. Quantification of  
46 mean cellular fluorescence and nucleus-to-cytosol ratios was done from 5 root tips, each consisting  
47 of the average of 5 meristematic epidermal cells.

#### 48 **Transmission electron microscopy**

49 Root tip samples were vitrified in 10% BSA with 8% methanol using a Wohlwend Compact 2 High  
50 Pressure Freezer (Engineering Office M. Wohlwend GmbH) prior to processing using an AFS2 with  
51 the FSP robot (Leica Microsystems) in a solution of 0.25% glutaraldehyde, 0.1% UA in dry acetone  
52 for 48 hours at -80°C. Samples were then warmed up to -50°C at a rate of 1°C/hr. The fixative  
53 was washed out with acetone three times for 10 minutes each and then samples were infiltrated in  
54 an increasing concentration of Lowicryl HM20 (22%, 33%, 66%, 100% x 3) prior to UV  
55 polymerization. Sections of 70nm were cut using an ultra45 diamond knife (Diatome) on a UC7  
56 Ultramicrotome (Leica Microsystems) and collected on slot grids coated with 1% formvar in  
57 chloroform. The sections were post-stained sequentially with uranyl acetate and lead citrate for 5  
58 minutes each and then imaged on a Tecnai G2 Spirit BioTWIN Transmission Electron Microscope  
59 (TEM) from FEI operating at 120 keV and equipped with an Olympus-SIS Veleta CCD Camera.

#### 60 ***In planta* SnRK1 activity assay**

61 Arabidopsis *NLS-ACC* seedlings were grown vertically for 8 days on calibrated Nytex mesh (pore  
62 size 30  $\mu$ m) on solid medium (0.5X MS). On day 9, two hours after the onset of the lights, the mesh  
63 squares holding the seedlings were transferred to new solid medium plates with or without 50  $\mu$ M  
64 ABA and returned to the growth chamber for 3h. Root tissues were thereafter separated from aerial  
65 parts and ground to a fine powder in liquid nitrogen. Root tissue powder (30 mg) was mixed with  
66 2x Laemmli buffer and incubated on ice for 20 min, vortexing every 5 min. Samples were thereafter  
67 boiled for 10 min, cooled on ice for 5 min, and centrifuged at 12000g for 5 min at 4°C to clear  
68 homogenates. The resulting supernatants (15  $\mu$ L) were analyzed by Western Blot with anti-P(S79)-

69 ACC (1:1000, 1673661S, Cell Signaling) and anti-HA-HRP (1:2000, 12013819001, Roche)  
70 antibodies.

### 71 **ABA time course and RPS6<sup>S240</sup> phosphorylation assays**

72 The ability of the indicated genotypes to repress RPS6<sup>S240</sup> phosphorylation in response to ABA was  
73 analyzed as described (2). Seedlings were grown vertically for 6 days on solid medium (0.5× MS +  
74 0.5% sucrose) and were thereafter transferred to liquid medium (0.5× MS medium + 0.5% sucrose)  
75 in 6-well tissue culture plates (10 seedlings per 9.5 cm<sup>2</sup> well containing 1 mL of medium) where  
76 they grew for the following 6 days. The liquid medium was refreshed 8h before the beginning of the  
77 last night and on the following day, samples were collected 2h after the onset of the lights (T0).  
78 Remaining seedlings were then treated with 50 μM ABA and/or 2.5 μM LMB for the indicated  
79 periods of time. In the case of the combined treatment of LMB and ABA, seedlings were  
80 preincubated with 2.5 μM LMB for 1h before the addition of ABA. Following the indicated  
81 treatments, samples were ground to a fine powder in liquid nitrogen and immediately placed in  
82 extraction buffer [50 mM Tris-HCl pH 8.0, 150 mM NaCl, 0.1% NP-40, 3 mM DTT, 50 μM MG-132,  
83 Phosphatase Inhibitor Cocktails 2 and 3 (Sigma; 20 μL each per 10 mL of extraction buffer) and  
84 cOmplete™ Protease Inhibitor Cocktail (Roche, 1 tablet per 10 mL of extraction buffer)] for total  
85 protein extraction (150 μL of buffer per 100 mg of ground tissue). Homogenates were cleared by  
86 centrifugation at 12000 g for 15 minutes at 4°C and supernatants were recovered for subsequent  
87 analyses. 50 μg of total protein extract of each sample were analyzed by Western Blot with anti-  
88 phospho-RPS6S<sup>240</sup> [1:5000, (9)] and anti-RPS6 antibodies (1:1000, sc-74459, Santa Cruz).

### 89 **Immunoblot analyses**

90 For immunoblotting, proteins were resolved by SDS-PAGE and transferred to PVDF membranes  
91 for 90 min 110V at 4°C using transfer buffer (192 mM glycine, 25 mM Tris, 0.1% SDS, 20% ethanol)  
92 and a Bio-Rad wet blotting transfer system. Membranes were blocked for at least 1h (5% w/v non-  
93 fat dry milk in 1X TBS, 0.05% Tween®) and then incubated with the relevant primary antibody  
94 under gentle rocking overnight at 4°C. Secondary antibodies conjugated with horseradish  
95 peroxidase (Jackson ImmunoResearch) were used at 1:20000 in 5% non-fat milk in TBS for 1h at  
96 RT. Chemiluminescence was performed using a SuperSignal West Femto Maximum Sensitivity  
97 Substrate (Thermo Scientific). Images were acquired using ChemiDoc system (Biorad) equipped  
98 with a CCD camera. For Ponceau staining membranes were incubated with 0.1% Ponceau S (w/v)  
99 in 5% acetic acid for 10 min and washed twice with 5% acetic acid.

### 100 **Chemicals**

101 Stocks of ABA (Duchefa Biochemie A0941; 10 mM stock in 50 mM Tris-HCl pH 8.5) and Leptomycin  
102 B (Santa Cruz Biotechnology sc-202210; 1 mM stock in ethanol), were prepared and stored at -  
103 20°C and used at the indicated concentrations.

#### 104 **Statistical analysis**

105 Basic data processing was performed in Excel. Statistical analyses were performed using  
106 GraphPad Prism version 8.4.0 for Windows, GraphPad Software, La Jolla California USA.

#### 107 **SI References**

- 108
- 109 1. H. Fujii, P. E. Verslues, J.-K. Zhu, Identification of Two Protein Kinases Required for  
110 Abscisic Acid Regulation of Seed Germination, Root Growth, and Gene Expression in  
111 Arabidopsis. *Plant Cell* **19**, 485–494 (2007).
- 112 2. B. Belda-Palazón, *et al.*, A dual function of SnRK2 kinases in the regulation of SnRK1  
113 and plant growth. *Nat. Plants* **6**, 1345–1353 (2020).
- 114 3. D. Dietrich, *et al.*, Root hydrotropism is controlled via a cortex-specific growth  
115 mechanism. *Nat. Plants* **3**, 1–8 (2017).
- 116 4. M. Bitrián, F. Roodbarkelari, M. Horváth, C. Koncz, BAC-recombineering for studying  
117 plant gene regulation: Developmental control and cellular localization of SnRK1 kinase  
118 subunits. *Plant J.* **65**, 829–842 (2011).
- 119 5. P. Crozet, *et al.*, Mechanisms of regulation of SNF1/AMPK/SnRK1 protein kinases. *Front.*  
120 *Plant Sci.* **5**, 190 (2014).
- 121 6. M. Ramon, *et al.*, Default activation and nuclear translocation of the plant cellular energy  
122 sensor SnRK1 regulate metabolic stress responses and development. *Plant Cell* **31**,  
123 1614–1632 (2019).
- 124 7. P. Muralidhara, *et al.*, Perturbations in plant energy homeostasis prime lateral root  
125 initiation via SnRK1-bZIP63-ARF19 signaling. *Proceedings of the National Academy of*  
126 *Sciences of the United States of America* **118** (2021).
- 127 8. J. B. Kelley, B. M. Paschal, Fluorescence-based quantification of nucleocytoplasmic  
128 transport. *Methods* **157**, 106–114 (2019).
- 129 9. T. Dobrenel, *et al.*, The arabidopsis TOR kinase specifically regulates the expression of  
130 nuclear genes coding for plastidic ribosomal proteins and the phosphorylation of the  
131 cytosolic ribosomal protein S6. *Front. Plant Sci.* **7**, 1611 (2016).
- 132
